# Supplementary material
Source: publisher figshare collection journal article supplement (https://sage.figshare.com/ndownloader/files/13024004)
Supplement: Supplementary file 1 [file 13024004]

## Appendix 1

### Sample Sections - Learner Questionnaire (Before Course)

Date completed (dd/mm/yyyy): \_\_/\_\_/20\_\_

About yourself

Name (optional): \_\_\_\_\_

Are you:      Male ☐      Female ☐

How old are you?

10-15 ☐      16-18 ☐      19-25 ☐      26-45 ☐      46-64 ☐      65+ ☐

For the following please give a rating using a scale of 0-10 (where 0 is lowest and 10 is highest) that you feel shows:

**How willing are you to help a member of your family in an emergency first aid situation?**

|                          |                          |                          |                          |                          |                          |                          |                          |                          |                          |                          |
|--------------------------|--------------------------|--------------------------|--------------------------|--------------------------|--------------------------|--------------------------|--------------------------|--------------------------|--------------------------|--------------------------|
| <input type="checkbox"/> |
| 0                        | 1                        | 2                        | 3                        | 4                        | 5                        | 6                        | 7                        | 8                        | 9                        | 10                       |

**How willing are you to help a friend in an emergency first aid situation?**

|                          |                          |                          |                          |                          |                          |                          |                          |                          |                          |                          |
|--------------------------|--------------------------|--------------------------|--------------------------|--------------------------|--------------------------|--------------------------|--------------------------|--------------------------|--------------------------|--------------------------|
| <input type="checkbox"/> |
| 0                        | 1                        | 2                        | 3                        | 4                        | 5                        | 6                        | 7                        | 8                        | 9                        | 10                       |

**How willing are you to help a stranger in an emergency first aid situation?**

|                          |                          |                          |                          |                          |                          |                          |                          |                          |                          |                          |
|--------------------------|--------------------------|--------------------------|--------------------------|--------------------------|--------------------------|--------------------------|--------------------------|--------------------------|--------------------------|--------------------------|
| <input type="checkbox"/> |
| 0                        | 1                        | 2                        | 3                        | 4                        | 5                        | 6                        | 7                        | 8                        | 9                        | 10                       |

**How willing are you to help a work colleague in an emergency first aid situation?**

|                          |                          |                          |                          |                          |                          |                          |                          |                          |                          |                          |
|--------------------------|--------------------------|--------------------------|--------------------------|--------------------------|--------------------------|--------------------------|--------------------------|--------------------------|--------------------------|--------------------------|
| <input type="checkbox"/> |
| 0                        | 1                        | 2                        | 3                        | 4                        | 5                        | 6                        | 7                        | 8                        | 9                        | 10                       |

**How confident are you that you can use first aid skills effectively in a real emergency?**

|                          |                          |                          |                          |                          |                          |                          |                          |                          |                          |                          |
|--------------------------|--------------------------|--------------------------|--------------------------|--------------------------|--------------------------|--------------------------|--------------------------|--------------------------|--------------------------|--------------------------|
| <input type="checkbox"/> |
| 0                        | 1                        | 2                        | 3                        | 4                        | 5                        | 6                        | 7                        | 8                        | 9                        | 10                       |



## Appendix 2

### Sample Sections - Learner Questionnaire (After Course)

Now that we've finished, please answer the same questions as you did before we began. This will show us whether there's been a change in how you feel about your first aid skills and confidence to use them. Please use the same 0-10 scale as before (where 0 is lowest and 10 is highest), to show:

**How willing are you to help a member of your family in an emergency first aid situation?**

|                          |                          |                          |                          |                          |                          |                          |                          |                          |                          |                          |
|--------------------------|--------------------------|--------------------------|--------------------------|--------------------------|--------------------------|--------------------------|--------------------------|--------------------------|--------------------------|--------------------------|
| <input type="checkbox"/> |
| 0                        | 1                        | 2                        | 3                        | 4                        | 5                        | 6                        | 7                        | 8                        | 9                        | 10                       |

**How willing are you to help a friend in an emergency first aid situation?**

|                          |                          |                          |                          |                          |                          |                          |                          |                          |                          |                          |
|--------------------------|--------------------------|--------------------------|--------------------------|--------------------------|--------------------------|--------------------------|--------------------------|--------------------------|--------------------------|--------------------------|
| <input type="checkbox"/> |
| 0                        | 1                        | 2                        | 3                        | 4                        | 5                        | 6                        | 7                        | 8                        | 9                        | 10                       |

**How willing are you to help a stranger in an emergency first aid situation?**

|                          |                          |                          |                          |                          |                          |                          |                          |                          |                          |                          |
|--------------------------|--------------------------|--------------------------|--------------------------|--------------------------|--------------------------|--------------------------|--------------------------|--------------------------|--------------------------|--------------------------|
| <input type="checkbox"/> |
| 0                        | 1                        | 2                        | 3                        | 4                        | 5                        | 6                        | 7                        | 8                        | 9                        | 10                       |

**How willing are you to help a work colleague in an emergency first aid situation?**

|                          |                          |                          |                          |                          |                          |                          |                          |                          |                          |                          |
|--------------------------|--------------------------|--------------------------|--------------------------|--------------------------|--------------------------|--------------------------|--------------------------|--------------------------|--------------------------|--------------------------|
| <input type="checkbox"/> |
| 0                        | 1                        | 2                        | 3                        | 4                        | 5                        | 6                        | 7                        | 8                        | 9                        | 10                       |

**How confident are you that you can use first aid skills effectively in a real emergency?**

|                          |                          |                          |                          |                          |                          |                          |                          |                          |                          |                          |
|--------------------------|--------------------------|--------------------------|--------------------------|--------------------------|--------------------------|--------------------------|--------------------------|--------------------------|--------------------------|--------------------------|
| <input type="checkbox"/> |
| 0                        | 1                        | 2                        | 3                        | 4                        | 5                        | 6                        | 7                        | 8                        | 9                        | 10                       |

**Has attending this activity helped you gain the level of skills you expected?**

No – less than expected ☐      Yes ☐      Yes and more ☐

**Has it helped you gain the level of confidence you expected?**

No – less than expected ☐      Yes ☐      Yes and more ☐

**How much do you agree with the following statements?**

|                                                                                                      | <b>Strongly agree</b>    | <b>Agree</b>             | <b>Neither agree nor disagree</b> | <b>Disagree</b>          | <b>Strongly disagree</b> |
|------------------------------------------------------------------------------------------------------|--------------------------|--------------------------|-----------------------------------|--------------------------|--------------------------|
| The session challenged some of my attitudes towards helping or not helping in an emergency situation | <input type="checkbox"/> | <input type="checkbox"/> | <input type="checkbox"/>          | <input type="checkbox"/> | <input type="checkbox"/> |
| The session made me feel that if I act, I am part of a team that includes the emergency services     | <input type="checkbox"/> | <input type="checkbox"/> | <input type="checkbox"/>          | <input type="checkbox"/> | <input type="checkbox"/> |
| The session made me think about the bystander effect                                                 | <input type="checkbox"/> | <input type="checkbox"/> | <input type="checkbox"/>          | <input type="checkbox"/> | <input type="checkbox"/> |

**Following the session do you agree with the following statements more, less, or has there been no change since the beginning of the session?**

|                                                                                | <b>Much more</b>         | <b>More</b>              | <b>No change</b>         | <b>Less</b>              | <b>Much less</b>         | <b>Not relevant to me</b> |
|--------------------------------------------------------------------------------|--------------------------|--------------------------|--------------------------|--------------------------|--------------------------|---------------------------|
| I'm aware of the reasons people help or don't help in an emergency             | <input type="checkbox"/>  |
| I'm aware of my own behaviour in an emergency situation                        | <input type="checkbox"/>  |
| I'm worried about doing the wrong thing in an emergency situation              | <input type="checkbox"/>  |
| I'm worried about getting sued in an emergency situation                       | <input type="checkbox"/>  |
| I'm worried about getting involved when confronted with an emergency situation | <input type="checkbox"/>  |
